# Supplementary material for: β- and γ-Actins in the nucleus of human melanoma A375 cells
Source: PubMed Central journal article supplement (PMC4628621; doi:10.1007/s00418-015-1349-8), 2015-08-04

## **$\beta$ - and $\gamma$ -Actin in the Nucleus of Human Melanoma A375 Cells**

Histochemistry and Cell Biology,

Marta Migocka-Patrzałek<sup>1,2,3\*</sup>, Aleksandra Makowiecka<sup>2</sup>, Dorota Nowak<sup>2</sup>, Antonina J. Mazur<sup>2</sup>, Wilma A. Hofmann<sup>3</sup>, Maria Malicka-Błaszkiwicz<sup>2</sup>

\*Corresponding author:

**Marta Migocka-Patrzałek**

Department of Animal Developmental Biology,

Institute of Experimental Biology,

Faculty of Biological Sciences,

University of Wrocław,

Sienkiewicza 21,

50-335 Wrocław, Poland

Tel: 0048 71 375 40 23

Fax: 0048 71 375 28 95

e-mail: marta.migocka-patrzalek@uni.wroc.pl

**ESM.3** Identification of actin in A375 cells overexpressing  $\beta$ - and  $\gamma$ -actin

**a** Confocal microscopy images of A375 cells transfected with HA-NLS- $\beta$ -actin construct. Cells were fixed and immunostained with antibodies against HA and  $\gamma$ -actin.

**b** Confocal microscopy images of A375 cells transfected with HA-NLS- $\gamma$ -actin construct. Cells were fixed and immunostained with antibodies against HA and  $\beta$ -actin. DAPI was used to mark the nucleus. Scale bar 150  $\mu$ m.

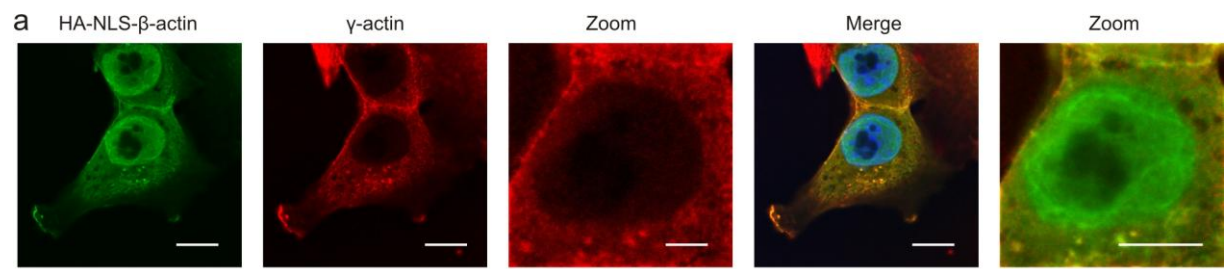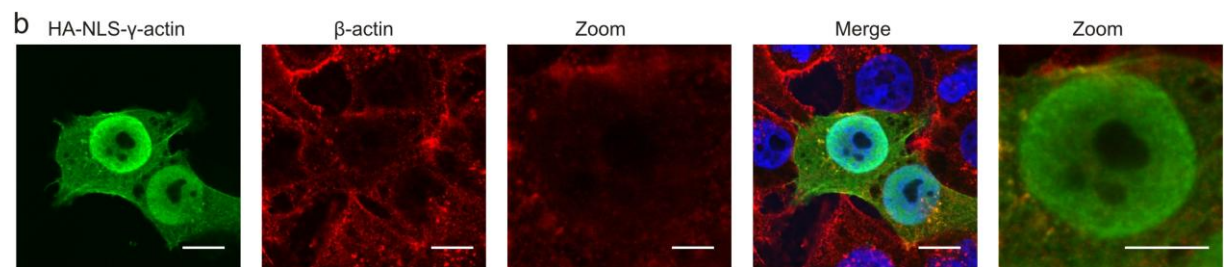

Supplement: 418_2015_1349_MOESM3_ESM.pdf [file 418_2015_1349_MOESM3_ESM.pdf]
